# Supplementary material
Source: PubMed Central journal article supplement (PMC4103360)
Supplement: 1403586111_pnas.201403586SI.pdf [file 1403586111_pnas.201403586SI.pdf]

# Supporting Information

Sothiselvam et al. 10.1073/pnas.1403586111

## SI Experimental Procedures

**Cell-Free Translation and Toeprinting.** Linear DNA templates (0.5–1 pmol) encoding the ORF of interest preceded by the T7 promoter were generated by PCR using primers shown in Table S2. The templates were used to direct transcription–translation in the  $\Delta$ ribosome PURExpress cell-free system (New England Biolabs). The reactions were supplemented with antibiotics and with wild-type or mutant ribosomes prepared as described in refs. 1–3 in a total volume of 5  $\mu$ L. The reactions were incubated for 10 min at 37 °C followed by a 5-min primer extension initiated by addition of reverse transcriptase. cDNA products were separated in a 6% sequencing gel and visualized with a Typhoon imager (GE).

Chemical probing of rRNA was performed using ribosomes prepared according to ref. 3. The 50- $\mu$ L reactions containing 80 mM K-Hepes, 10 mM MgCl<sub>2</sub>, 100 mM NH<sub>4</sub>Cl and 200 nM ribosomes were preincubated for 5 min at 42 °C. After addition of antibiotic to a final concentration of 50  $\mu$ M, reactions were incubated for 10 min at 37 °C and 10 min at room temperature. 1-Methyl-7-nitroisatoic anhydride reagent (1M7) (4) was added to a final concentration of 16 mM; after incubation for 1.25 min at 37 °C and 1 min at room temperature, reactions were quenched by addition of stop buffer containing 3 M NaOAc and 0.5 M K-borate. As described previously (5), 1M7-modified RNA was extracted and analyzed by primer extension.

**Molecular Dynamics Simulations.** All simulations were performed using NAMD 2.9 (6) with the AMBER99SB force field (7, 8), which includes parameters for modified nucleosides (9). Modeling and analysis also used the program VMD (10). The

equations of motion were integrated with a 1-fs time step and bonded interactions, nonbonded short-range interactions, and nonbonded long-range interactions were calculated every one, two, and four time steps, respectively. The particle mesh Ewald method (11, 12) was used to evaluate the nonbonded long-range electrostatic interactions. All simulations were carried out in the NpT ensemble at  $T = 310$  K and  $P = 1$  atm with the following protocol: water and ions were first equilibrated for 2 ns with the remainder of the simulation system restrained, after which side chains of proteins and bases of nucleotides were allowed to move for another 5 ns. Finally, all restraints were released for an equilibration of an additional 10 ns. After these first 17-ns initial equilibrations, production simulations were performed for each system (Fig. S6D). All analyses were carried out using only the production simulation data.

The force-field parameters of erythromycin were optimized in two steps. In the first step, the parameterization of partial charges of atoms followed the standard procedure for AMBER, fitting restricted electrostatic potentials generated from quantum mechanics calculations at the RHF/6–31G\* level (13). The calculations and fitting were performed using Gaussian (14) and Antechamber (15), respectively. In the second step, all the bonded terms were deduced based on analogous bonded types available in the AMBER99SB force field (7, 8), except for the length of bonds and the values of angles involving heavy atoms, which were taken directly from the crystal structures. The resulting parameter files and the associated topology files needed for simulations with NAMD are available at [www.ks.uiuc.edu/~boliu/eryAMBER/](http://www.ks.uiuc.edu/~boliu/eryAMBER/).

1. Vazquez-Laslop N, Thum C, Mankin AS (2008) Molecular mechanism of drug-dependent ribosome stalling. *Mol Cell* 30(2):190–202.
2. Vázquez-Laslop N, et al. (2011) Role of antibiotic ligand in nascent peptide-dependent ribosome stalling. *Proc Natl Acad Sci USA* 108(26):10496–10501.
3. Ohashi H, Shimizu Y, Ying BW, Ueda T (2007) Efficient protein selection based on ribosome display system with purified components. *Biochem Biophys Res Commun* 352(1):270–276.
4. Merino EJ, Wilkinson KA, Coughlan JL, Weeks KM (2005) RNA structure analysis at single nucleotide resolution by selective 2'-hydroxyl acylation and primer extension (SHAPE). *J Am Chem Soc* 127(12):4223–4231.
5. Merryman C, Noller HF (1998) Footprinting and modification-interference analysis of binding sites on RNA. *RNA: Protein Interactions, A Practical Approach*, ed Smith CWJ (Oxford Univ Press, Oxford), pp 237–253.
6. Phillips JC, et al. (2005) Scalable molecular dynamics with NAMD. *J Comput Chem* 26(16):1781–1802.
7. Hornak V, et al. (2006) Comparison of multiple Amber force fields and development of improved protein backbone parameters. *Proteins* 65(3):712–725.
8. Cornell WD, et al. (1995) A second generation force field for the simulation of proteins, nucleic acids, and organic molecules. *J Am Chem Soc* 117(19):5179–5197.
9. Aduri R, et al. (2007) AMBER force field parameters for the naturally occurring modified nucleosides in RNA. *J Chem Theory Comput* 3(4):1464–1475.
10. Humphrey W, Dalke A, Schulten K (1996) VMD: Visual molecular dynamics. *J Mol Graphics Modell* 14(1):33–38.
11. Darden Y, York D, Pedersen L (1993) Particle mesh Ewald: An N-log(N) method for Ewald sums in large systems. *J Chem Phys* 98(12):10089–10092.
12. Essmann U, et al. (1995) A smooth particle mesh ewald method. *J Chem Phys* 103(19):8577–8593.
13. Bayly CI, Cieplak P, Cornell WD, Kollman PA (1993) A well-behaved electrostatic potential based method using charge restraints for deriving atomic charges—the Resp model. *J Phys Chem B* 97(40):10269–10280.
14. Frisch MJT, et al. (2004) Gaussian 03. (Gaussian, Inc., Wallingford, CT), Revision C.02.
15. Wang JM, Wang W, Kollman P, Case DA (2005) Antechamber: An accessory software package for molecular mechanical calculations. *J Comput Chem* 25(9):1157–1174.













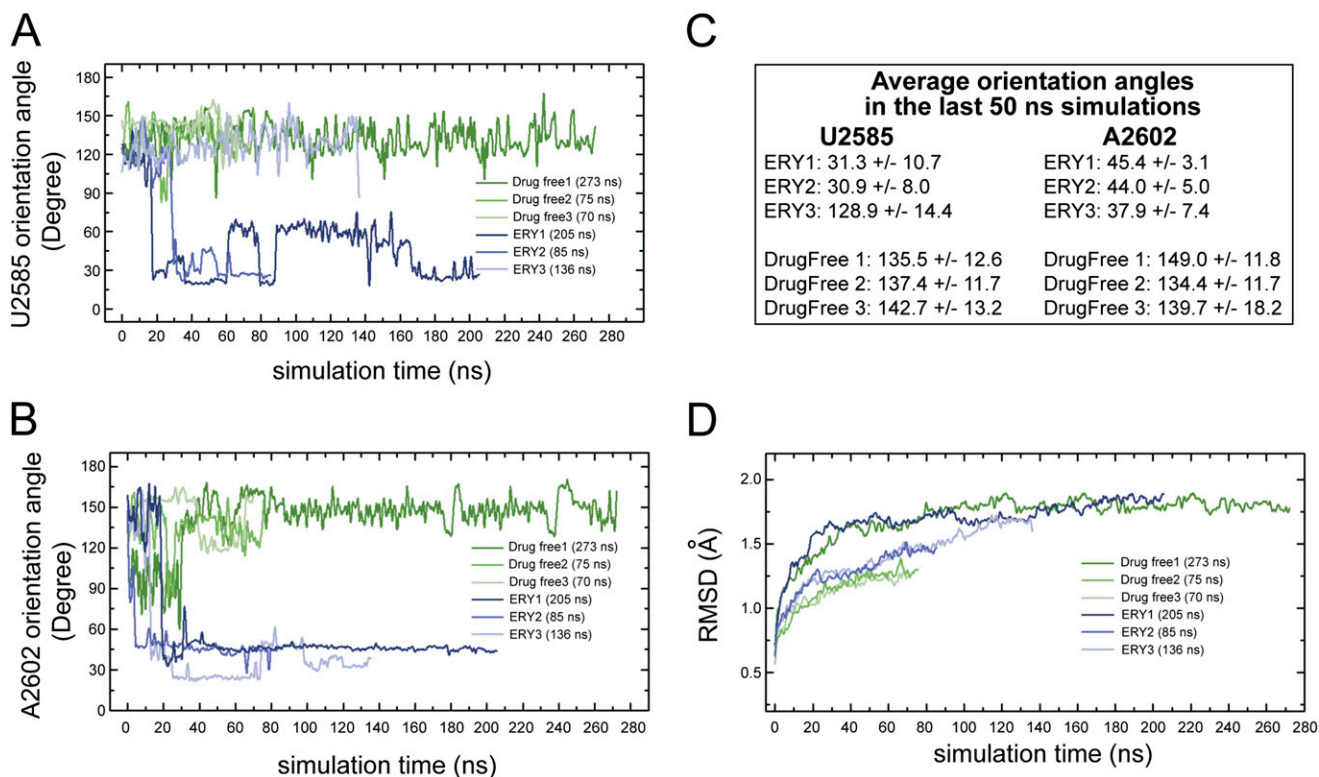

**Fig. S6.** Equilibration of the ribosome structure and conformations of U2585 and A2602 rRNA residues during MD simulations. (A) The changes in the orientation angle of U2585 over simulation time. The orientation angle is defined as in Fig. 6B. ERY1, ERY2, and ERY3 are independent simulations of the ERY-bound ribosome. Drug free1, Drug free2, and Drug free3 are independent simulations of the drug-free ribosome. (B) Same as A, but for A2602. (C) Average orientation angles of U2585 and A2602 during the last 50-ns simulations ( $\pm$  SD). (D) The rmsd-vs.-time plot for nonhydrogen atoms shows the progress of reaching stable equilibrium during the all-atom ribosome MD simulations. Drug-free and ERY-bound ribosome structures were aligned to reference crystallographic structures 2AVY/2AW4 and 3OFO/3OFR, respectively, and rmsd values were calculated between simulation frames and the corresponding reference structures [2AVY/2AW4 (1) for the drug-free ribosome and 3OFO/3OFR (2) for the ERY-bound ribosome]. All nonhydrogen atoms within 40 Å of U2585 in each system were considered in the rmsd calculations.

- Schuwirth BS, et al. (2005) Structures of the bacterial ribosome at 3.5 Å resolution. *Science* 310(5749):827–834.
- Dunkle JA, Xiong L, Mankin AS, Cate JH (2010) Structures of the *Escherichia coli* ribosome with antibiotics bound near the peptidyl transferase center explain spectra of drug action. *Proc Natl Acad Sci USA* 107(40):17152–17157.





**Table S1. Putative RLR leader peptides of the macrolide resistance genes**

| Gene <sup>†</sup>      | Species                                          | Putative leader peptide <sup>‡</sup>   | GenBank PID | GenBank GID | SD score <sup>§</sup> |
|------------------------|--------------------------------------------------|----------------------------------------|-------------|-------------|-----------------------|
| <i>erm37</i>           | <i>Kribbella flavida</i>                         | <b>MGRLRP</b> (28AA)                   | 284033869   | 284027999   | 5                     |
| <i>ermZ*</i>           | <i>Streptomyces caelestis</i> <sup>¶</sup>       | <b>MGPRLRR</b> (8AA)                   | 284518868   | 284518867   | 4                     |
| <i>ermB</i>            | <i>Lactobacillus crispatus</i>                   | <b>MEIRLRS</b> (18AA)                  | 33243437    | 33243436    | 5                     |
| <i>ermT*</i>           | <i>Lactobacillus fermentum</i>                   | <b>MEIRLRS</b> (18AA)                  | 28373207    | 28373195    | 5                     |
| <i>ermB</i>            | <i>Lactobacillus reuteri</i>                     | <b>MEIRLRS</b> (18AA)                  | 2623780     | 2623778     | 5                     |
| <i>ermB</i>            | <i>Streptococcus pneumoniae</i> <sup>¶</sup>     | <b>MEIRLRS</b> (18AA)                  | 182684297   | 182682970   | 5                     |
| <i>ermB</i>            | <i>Enterococcus faecium</i> <sup>¶</sup>         | <b>MEIRLRS</b> (18AA)                  | 32470479    | 32470458    | 5                     |
| <i>ermB</i>            | <i>Lactococcus garvieae</i>                      | <b>MEIRLRS</b> (18AA)                  | 187729640   | 187729634   | 5                     |
| <i>ermB</i>            | <i>Enterococcus faecalis</i> <sup>¶</sup>        | <b>MEIRLRS</b> (18AA)                  | 256965588   | 242362021   | 5                     |
| <i>ermB</i>            | <i>E. faecalis</i> <sup>¶</sup>                  | <b>MEIRLRS</b> (18AA)                  | 305678698   | 305678685   | 5                     |
| <i>ermB</i>            | <i>Pediococcus acidilactici</i>                  | <b>MEIRLRS</b> (18AA)                  | 190410490   | 190410480   | 5                     |
| <i>ermB</i>            | <i>S. pneumoniae</i> <sup>¶</sup>                | <b>MEIRLRS</b> (18AA)                  | 138752661   | 138752654   | 5                     |
| <i>ermD*</i>           | <i>Bacillus clausii</i> <sup>¶</sup>             | <b>MYFIRLRF</b> (5AA)                  | 56965270    | 56961782    | 6                     |
| <i>ermD*</i>           | <i>B. clausii</i> <sup>¶</sup>                   | <b>MHFIRLRF</b> (5AA)                  | 37359459    | 37359457    | 6                     |
| <i>ermG</i>            | <i>Bacteroides coprophilus</i>                   | <b>MYWTRIRY</b> (16AA)                 | 224026271   | 221217255   | 5                     |
| <i>ermD</i>            | <i>Bacillus licheniformis</i>                    | <b>MTHSMRLRF</b> (6AA)                 | 143201      | 511060863   | 6,6                   |
| <i>ermJ</i>            | <i>Bacillus anthracis</i>                        | <b>MTHSMRLRF</b> (6AA)                 | 730032      | 143196      | 6,6                   |
| <i>msrSA</i>           | <i>Staphylococcus aureus</i> <sup>¶</sup>        | <b>MTASMRK</b>                         | 6594277     | 486222549   | 7                     |
| <i>ermD*</i>           | <i>Desmospora</i> sp.                            | <b>MLVYIRLRF</b> (5AA)                 | 333373800   | 333373795   | 7,6                   |
| <i>ermZ*</i>           | <i>S. caelestis</i> <sup>¶</sup>                 | <b>MTQSTRLRG</b> (82AA)                | 284518868   | 284518867   | 5                     |
| <i>ermD*</i>           | <i>Paenibacillus</i> sp. <sup>¶</sup>            | <b>MRGVCRIRT</b> (28AA)                | 261405179   | 261403876   | 4                     |
| <i>ermD*</i>           | <i>Paenibacillus</i> sp. <sup>¶</sup>            | <b>MRGVRIRIT</b> (28AA)                | 329930026   | 329930019   | 4                     |
| <i>ermB</i>            | <i>Streptococcus suis</i>                        | <b>MIVDDKIRI</b> (6AA)                 | 223932186   | 223932093   | 6                     |
| <i>erm36*</i>          | <i>Alkaliphilus oremlandii</i>                   | <b>MGIASIRIRN</b> (4AA)                | 158321869   | 158319059   | 6                     |
| <i>ermB</i>            | <i>Enterococcus gallinarum</i>                   | <b>MWIWVKIKY</b> (15AA)                | 257869905   | 239633765   | 5,8                   |
| <i>ermD*</i>           | <i>Paenibacillus</i> sp. <sup>¶</sup>            | <b>MCCIAFIRIR</b>                      | 261405179   | 261403876   | 7                     |
| <i>ermU*</i>           | <i>Tsukamurella paurometabola</i>                | <b>MEPHRYLRIRF</b> (5AA)               | 296138265   | 296137750   | 7                     |
| <i>ermU*</i>           | <i>Microlonatus phosphovororus</i>               | <b>MGIFATIERIRG</b> (1AA)              | 336117971   | 336115651   | 6                     |
| <i>erm39*</i>          | <i>Mycobacterium boenickei</i>                   | <b>MAAMSVTHLRLRI</b> (1AA)             | 73486998    | 73486996    | 6,5,5                 |
| <i>erm39*</i>          | <i>Mycobacterium neworleansense</i>              | <b>MASMSVTTYIRLRI</b> (1AA)            | 73487011    | 73487010    | 5,5,5                 |
| <i>erm39*</i>          | <i>Mycobacterium houstonense</i>                 | <b>MASMSVTTYIRLRI</b> (1AA)            | 73487007    | 73487005    | 5,7,7                 |
| <i>ermX*</i>           | <i>Arcanobacterium pyogenes</i>                  | <b>MLISGTAFLRLRS</b> (2AA)             | 38261101    | 38261095    | 6                     |
| <i>ermX*</i>           | <i>Corynebacterium glucuronolyticum</i>          | <b>MLISGTAFLRLRT</b> (2AA)             | 227487333   | 209951644   | 6                     |
| <i>ermX*</i>           | <i>Actinomyces</i> sp.                           | <b>MLVLGTASLRLRT</b> (1AA)             | 329944089   | 329944073   | 5                     |
| <i>ermB</i>            | <i>E. faecium</i> <sup>¶</sup>                   | <b>MVNPVMEIRLRS</b> (18AA)             | 294617740   | 294617735   | 6,5                   |
| <i>ermB</i>            | <i>Lactobacillus acidophilus</i>                 | <b>MVNPVMEIRLRS</b> (18AA)             | 325955700   | 325955697   | 6,5                   |
| <i>ermB</i>            | <i>Lactobacillus plantarum</i>                   | <b>MVNPVMEIRLRS</b> (18AA)             | 228860921   | 228860919   | 6,5                   |
| <i>ermB</i>            | <i>Streptococcus pyogenes</i> <sup>¶</sup>       | <b>MVNPVMEIRLRS</b> (18AA)             | 63022016    | 63021982    | 6,5                   |
| <i>ermS*</i>           | <i>Streptomyces violaceusniger</i> <sup>¶</sup>  | <b>MPGWRVRSRLRL</b> (20AA)             | 307329006   | 307328957   | 3,6                   |
| <i>erm39*</i>          | <i>Mycobacterium porcinum</i>                    | <b>MTAMSVTYLRRLT</b> (1AA)             | 90901924    | 90901922    | 4,4,4                 |
| <i>ermQ</i>            | <i>Clostridium bartlettii</i> <sup>¶</sup>       | <b>MIMNGGIASIRLRR</b>                  | 164687690   | 163813840   | 8,8                   |
| <i>erm39*</i>          | <i>Mycobacterium wolinskyi</i>                   | <b>MAAMSAATFFFIRIRI</b> (3AA)          | 73487015    | 73487013    | 4,5                   |
| <i>ermB</i>            | <i>Streptococcus agalactiae</i>                  | <b>MAEIVKEVMEIRLRS</b> (18AA)          | 392560      | 392558      | 5,5                   |
| <i>ermU*</i>           | <i>Streptomyces</i> sp.                          | <b>MGATFAAYALIRLN</b> (1AA)            | 302527546   | 224581096   | 5                     |
| <i>erm39*</i>          | <i>Mycobacterium mageritense</i> <sup>¶</sup>    | <b>MTDVHNGSPTGRLS</b> (22AA)           | 45758647    | 45758644    | 5                     |
| <i>erm39*</i>          | <i>M. mageritense</i> <sup>¶</sup>               | <b>MVAMSAACFFIRIRI</b> (1AA)           | 45758647    | 45758644    | 6,6,8                 |
| <i>ermX*</i>           | <i>Kytococcus sedentarius</i> <sup>¶</sup>       | <b>MITAGRLFQARLRH</b> (14AA)           | 256825598   | 256823905   | 7                     |
| <i>ermD*</i>           | <i>Bacillus halodurans</i>                       | <b>MIKRNAFGFRYDRLRN</b> (16AA)         | 15612943    | 57596592    | 5                     |
| <i>ermX*</i>           | <i>Bifidobacterium thermophilum</i> <sup>¶</sup> | <b>MDIIRPMLISGTAFLRLRT</b> (2AA)       | 188593347   | 188593344   | 4,7                   |
| <i>ermX*</i>           | <i>B. thermophilum</i> <sup>¶</sup>              | <b>MDIIRPMLISGTAFLRLRT</b> (2AA)       | 188593350   | 188593348   | 4,7                   |
| <i>ermX*</i>           | <i>Corynebacterium diphtheriae</i>               | <b>MDIIRPMLISGTAFLRLRT</b> (2AA)       | 32470494    | 32470491    | 4,7                   |
| <i>ermX*</i>           | <i>Corynebacterium jeikeium</i>                  | <b>MDIIRPMLISGTAFLRLRT</b> (2AA)       | 13517628    | 13517627    | 4,7                   |
| <i>ermX*</i>           | <i>Corynebacterium striatum</i>                  | <b>MDIIRPMLISGTAFLRLRT</b> (2AA)       | 32479370    | 32479367    | 4,7                   |
| <i>ermQ</i>            | <i>C. bartlettii</i> <sup>¶</sup>                | <b>MKGVVVMKNLYIMLNKLLK</b> (10AA)      | 164687690   | 163813840   | 5,8,5                 |
| <i>msrC</i>            | <i>E. faecium</i> <sup>¶</sup>                   | <b>MCGNLIKKEVGKMTASMKLRF</b> (6AA)     | 10442770    | 552941973   | 4,8,7                 |
| <i>erm36*</i>          | <i>Gordonia bronchialis</i>                      | <b>MGLTYSAPSSARNTNMGRLRR</b> (1AA)     | 262203305   | 262200046   | 4,5                   |
| <i>ermU*</i>           | <i>Pseudonocardia</i> sp.                        | <b>MRGRHGPNVRAVAAFMLRLRV</b> (1AA)     | 324998303   | 324330628   | 6,5,5                 |
| <i>ermA</i>            | <i>S. pyogenes</i> <sup>¶</sup>                  | <b>MYMYCSSRYFISFIMKIKG</b> (22AA)      | 338795795   | 338795780   | 9,7,6                 |
| <i>ermA</i>            | <i>S. pyogenes</i> <sup>¶</sup>                  | <b>MYMYCSSRYFISFIMKIKG</b> (22AA)      | 94995100    | 94993396    | 9,7,6                 |
| <i>ermX*</i>           | <i>K. sedentarius</i> <sup>¶</sup>               | <b>MAVGSPTLVGMVLVGTASLRLRS</b> (1AA)   | 256825598   | 256823905   | 6,6,6                 |
| <i>ermD*</i>           | <i>B. clausii</i> <sup>¶</sup>                   | <b>MKASGVFLFSFTLSRRRFLRL</b> (4AA)     | 56965270    | 56961782    | 5                     |
| <i>ermZ*</i>           | <i>S. caelestis</i> <sup>¶</sup>                 | <b>MRQQAPNSGSSSCTRPADEIRIL</b> (49AA)  | 284518868   | 284518867   | 5                     |
| <i>erm<sup>1</sup></i> | <i>Nocardia farcinica</i>                        | <b>MSRMCAA VNGACAVGAYFLRLRR</b> (15AA) | 54024690    | 54021964    | 4,6,6,6               |
| <i>ermD*</i>           | <i>Geobacillus</i> sp.                           | <b>MIMLYYYRFLKMEGLVFTFIRLRS</b> (5AA)  | 312109334   | 312109151   | nd, 7,4,8             |

**Table S1. Cont.**

| Gene <sup>†</sup> | Species                               | Putative leader peptide <sup>‡</sup>              | GenBank PID | GenBank GID | SD score <sup>§</sup> |
|-------------------|---------------------------------------|---------------------------------------------------|-------------|-------------|-----------------------|
| <i>ermF</i>       | <i>Bacteroides fragilis</i>           | MLPVI <b>CGGYLLFVCIGLGLPRLRI</b> (14AA)           | 255012163   | 222299655   | 6,6,7                 |
| <i>ermS</i> *     | <i>S. violaceusniger</i> <sup>¶</sup> | MEKGVATGRTRSRLRCGDTAEI <b>RIRD</b> (70AA)         | 307329006   | 307328957   | 7                     |
| <i>ermD</i> *     | <i>Paenibacillus</i> sp. <sup>¶</sup> | MLFYPFHLEDCPDMCCIAFI <b>RIR</b>                   | 329930026   | 329930019   | 6,6                   |
| <i>ermU</i> *     | <i>Catenulispora acidiphila</i>       | <b>MTPSFPPYSHINDGKIQRALARLRD</b> (17AA)           | 256395256   | 256389232   | 8                     |
| <i>ermB</i>       | <i>S. aureus</i> <sup>¶</sup>         | MGEKWPSRVLGTFNSSV <b>TRVVKLRS</b>                 | 329315326   | 329312723   | 4,4                   |
| <i>ermB</i>       | <i>S. pneumoniae</i> <sup>¶</sup>     | MYFSICNRRVLF <b>TKLLAGRGERLRG</b> (6AA)           | 182683142   | 182682970   | nd, 5                 |
| <i>ermE</i> *     | <i>Thermomonospora curvata</i>        | MHTCAAPPGGAAAPACAPAF <b>RRLRT</b> (9AA)           | 269124773   | 269124277   | 5                     |
| <i>erm39</i> *    | <i>Mycobacterium fortuitum</i>        | MGQAHRRSRAEIELSVRPPAPTVAAMS <b>VTYIRLRI</b> (1AA) | 40807669    | 40807664    | 5,5,5,5               |

Methyltransferase proteins of the Erm class were searched in the National Center for Biotechnology Information "nr" database with PSI-BLAST using *Streptomyces venezuelae* PikR1 (GenInfo Identifier number 3800833) as the query. The sequences were aligned with MAFFT (1), and after ambiguously aligned regions were removed, phylogenetic analysis was carried out with RaxML (2) to classify the sequences into the various subgroups of Erm methyltransferases. The reconstructed phylogenetic tree is available upon request from G.C.A. (gemma.atkinson@gmail.com) or T.T. (tanel.tenson@ut.ee). Search for upstream ORFs were performed within 500 bps upstream from the start of Erm-like methyltransferase genes. Several macrolide efflux pump genes known to be controlled by the leader ORFs were added to the table. The upstream sequences were translated in all three reading frames and scanned for ORFs starting with AUG or GUG codons and containing at least five codons. The ORFs encoding peptides containing the (R/K)(L/I)(R/K) motifs were selected, and the putative Shine–Dalgarno sequences within 21 bp upstream from a possible start codon were identified.

<sup>†</sup>The names of the *erm* genes previously assigned to a specific *erm* class are shown without asterisks. Genes whose class assignment is based on the proximity in the phylogenetic tree are indicated by asterisks. Leader ORFs at which ribosome stalling was assessed experimentally (Fig. S1) are highlighted in yellow. The *ermDL* ORF, which was subjected to truncation mutagenesis and detailed biochemical analysis, is highlighted in cyan.

<sup>‡</sup>The peptides with the initiator site within 25 codons upstream from the conserved motif are shown. Alternative potential initiation sites (corresponding to in-frame AUG or GUG codons) are indicated by boldface characters.

<sup>§</sup>The Shine–Dalgarno score (SD score) was computed by calculating the number of identical nucleotides of the best match within 21 bp upstream from a possible start codon to the idealized sequence AAGGAGGTGATC. When the first initiator codon was within less than 12 nt from the beginning of the available sequence, SD score was not determined (nd).

<sup>¶</sup>Same species, different strains.

<sup>||</sup>No single closely homologous *erm* gene.

1. Katoh K, Kuma K, Toh H, Miyata T (2005) MAFFT version 5: Improvement in accuracy of multiple sequence alignment. *Nucleic Acids Res* 33(2):511–518.
2. Stamatakis A (2006) RAXML-VI-HPC: Maximum likelihood-based phylogenetic analyses with thousands of taxa and mixed models. *Bioinformatics* 22(21):2688–2690.



simulation system

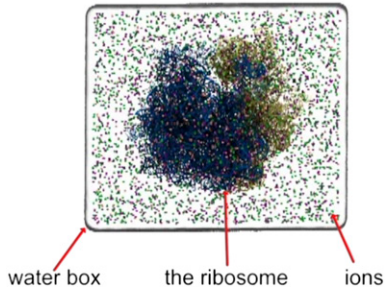

**Movie S1.** Conformational rearrangement of the PTC residues U2585 and A2602 induced by binding of ERY in the ribosomal exit tunnel; MD simulations.

[Movie S1](#)
